# Supplementary material for: In situ cell division and mortality rates of SAR11, SAR86, Bacteroidetes, and Aurantivirga during phytoplankton blooms reveal differences in population controls
Source: PubMed Central journal article supplement (PMC10308942; doi:10.1128/msystems.01287-22), 2023-05-17
Supplement: msystems.01287-22-s0002.pdf [file msystems.01287-22-s0002.pdf]

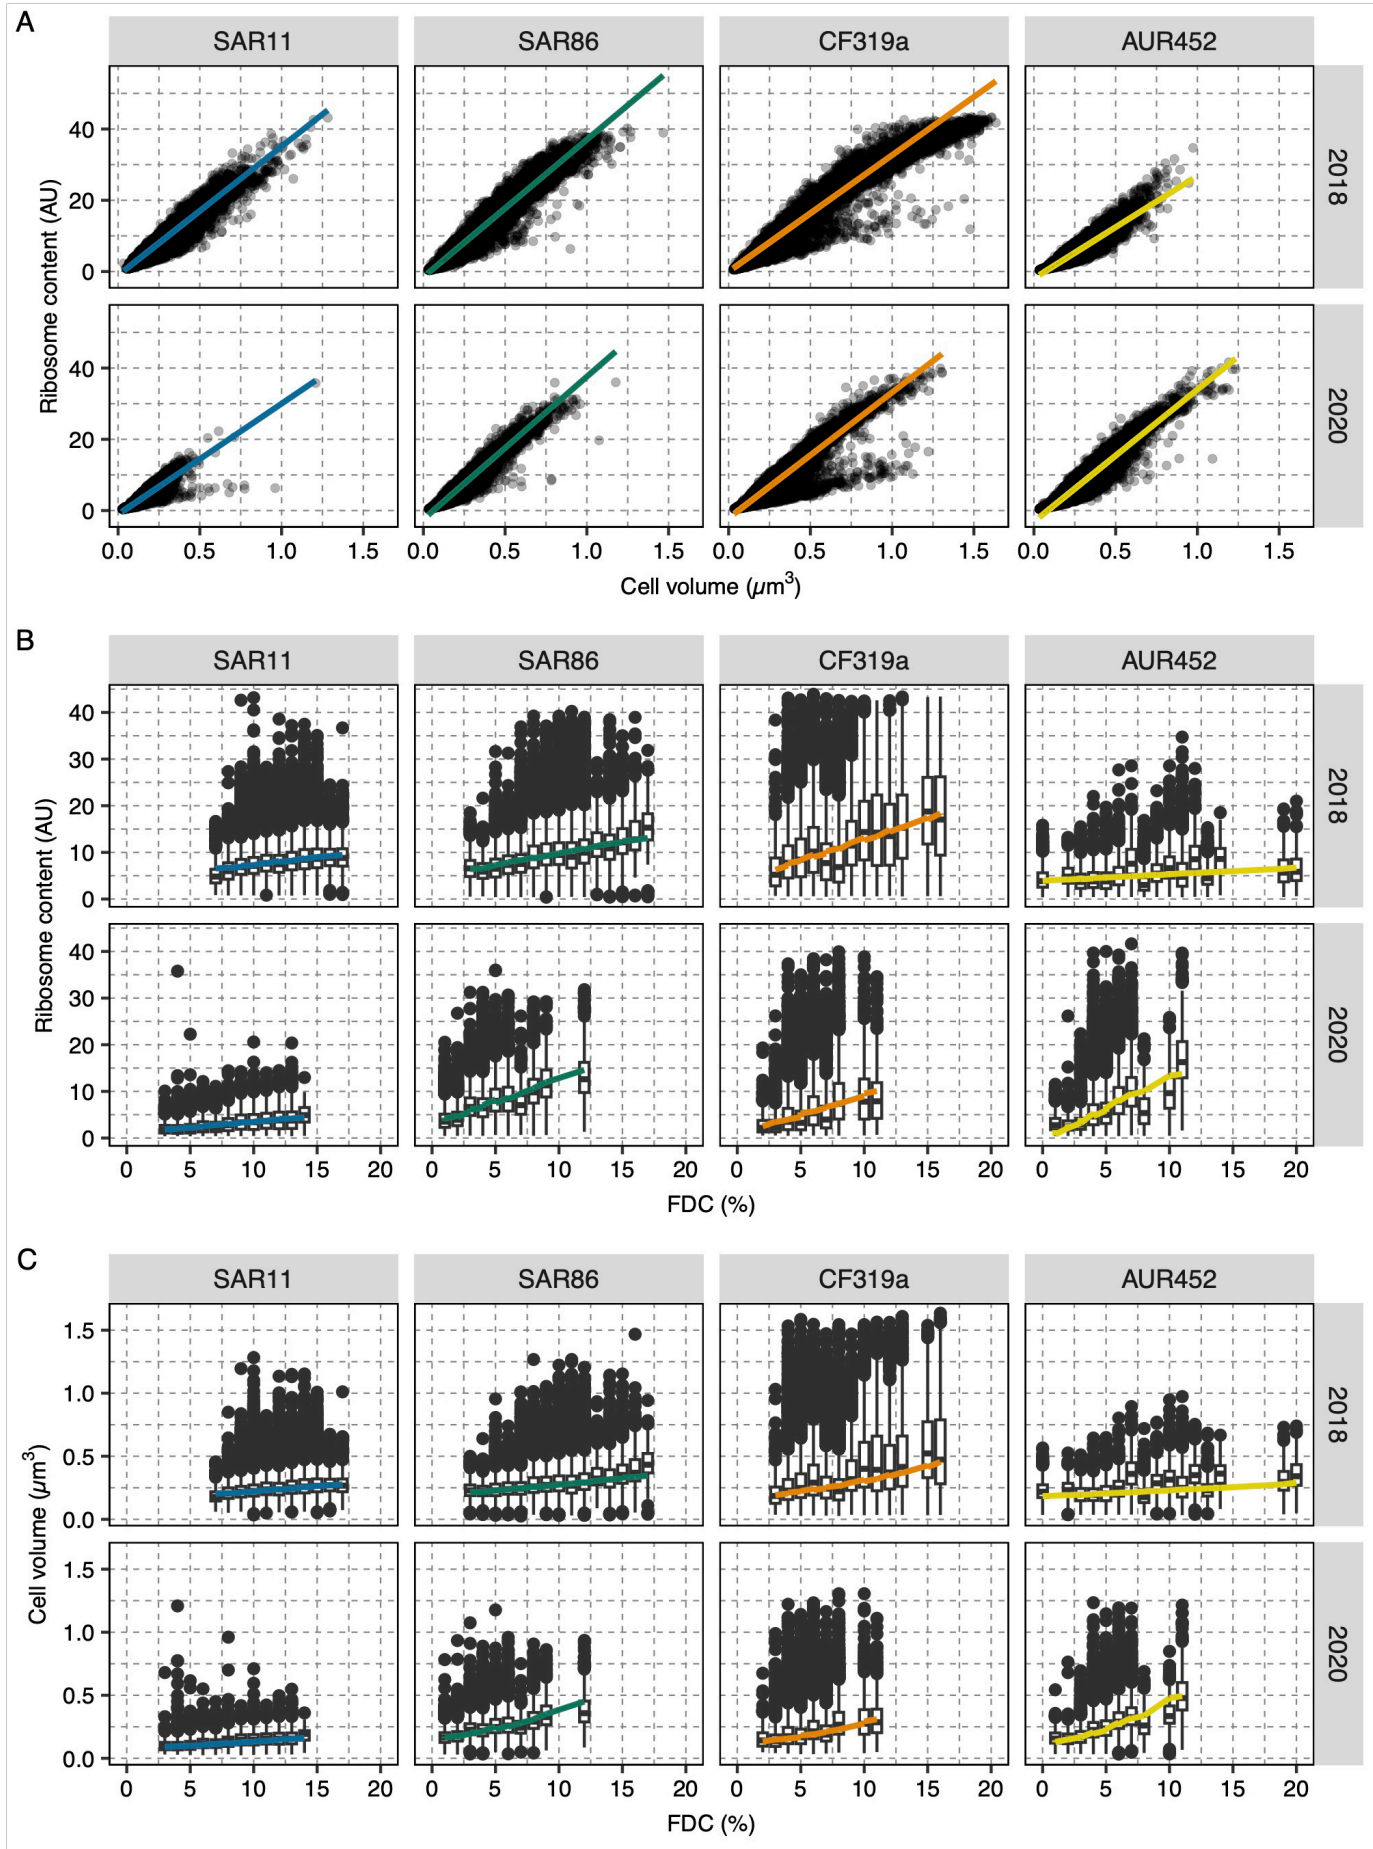

**Figure S2** Taxon and year-specific correlation of cellular parameters measured with FISH.

(A) Ribosome content to cell volume. (B) Ribosome content over FDC. (C) Cell volume over FDC. Box-whisker plots in (B) and (C) range from 25<sup>th</sup> to 75<sup>th</sup> percentile and the whiskers represent 1.5\* interquartile range. Outliers are visualized by dots. Mean is drawn as a solid line inside the boxes. Statistic results of regressions are reported supplementary results.
