# Supplementary material for: In situ cell division and mortality rates of SAR11, SAR86, Bacteroidetes, and Aurantivirga during phytoplankton blooms reveal differences in population controls
Source: PubMed Central journal article supplement (PMC10308942; doi:10.1128/msystems.01287-22), 2023-05-17
Supplement: msystems.01287-22-s0004.pdf [file msystems.01287-22-s0004.pdf]

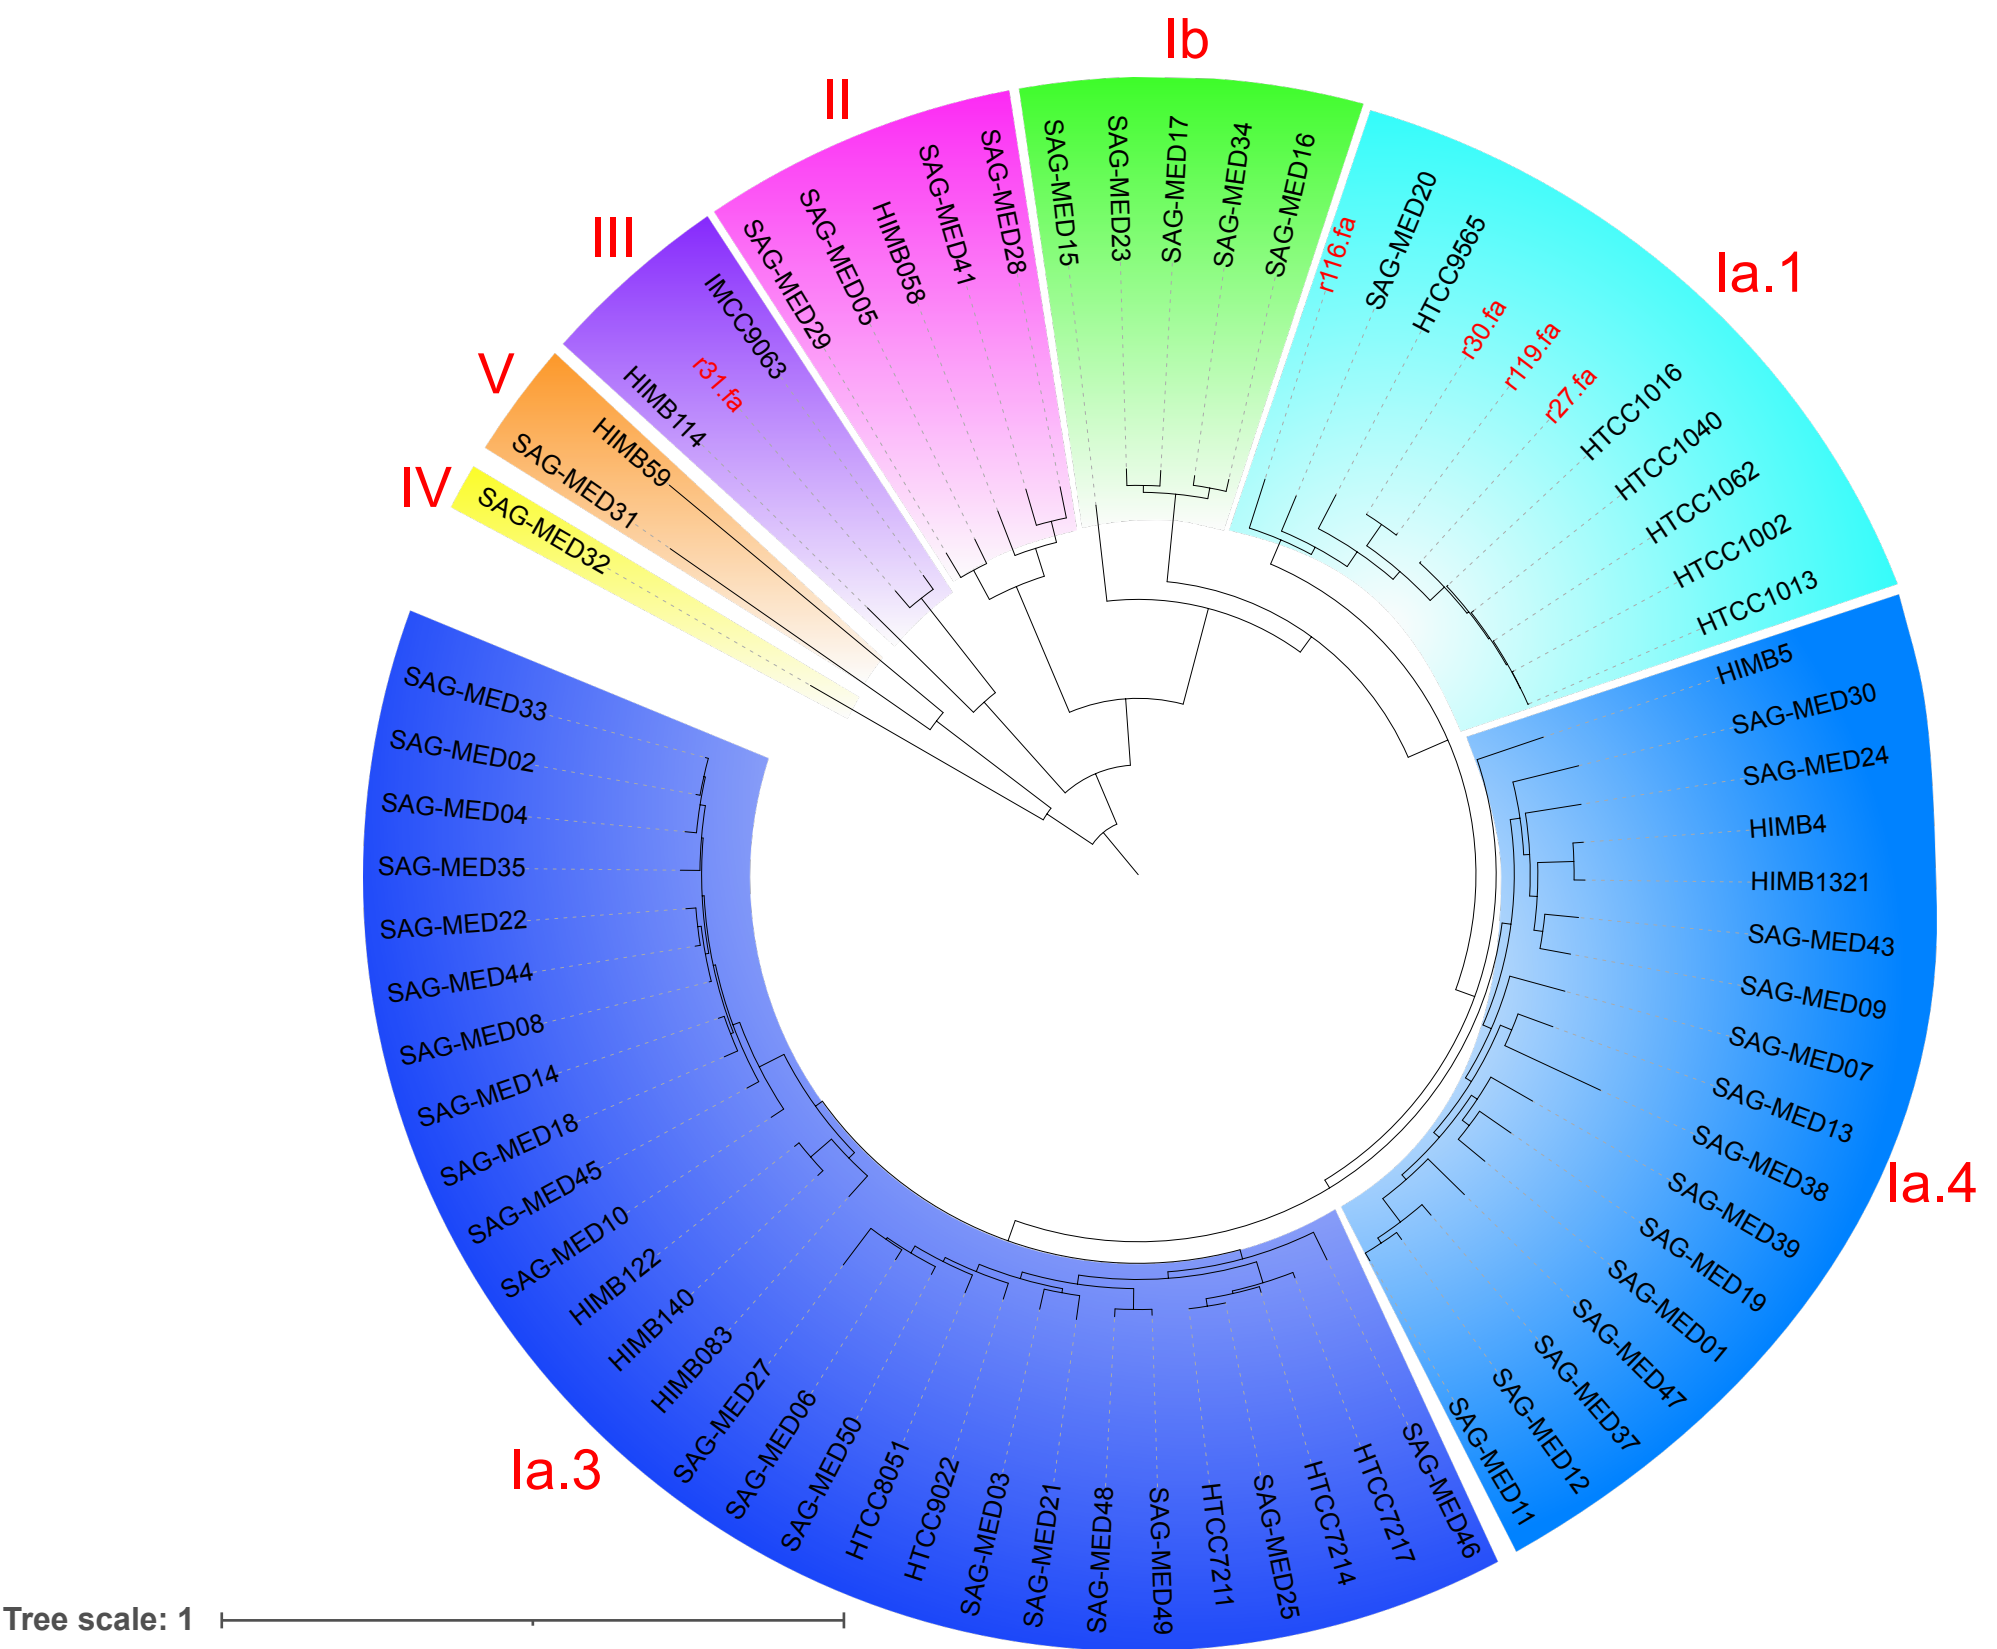

**Figure S4** Phylogenetic tree with SAR11 MAGs that have >50% completeness and <5% contamination described in this study with previously published SAR11 single amplified genomes (SAGs) (Haro-Moreno JM, Rodriguez-Valera F, Rosselli R, Martinez-Hernandez F, Roda-Garcia JJ, Gomez ML, Fornas O, Martinez-Garcia M, López-Pérez M. 2020. *Environmental Microbiology* 22:1748–1763) and SAR11 isolates (Delmont TO, Kiefl E, Kilinc O, Esen OC, Uysal I, Rappe MS, Giovannoni S, Eren AM. 2019. *eLife* 8:e46497). Colours according to clade assignment (indicated in outer ring) according to the literature (see above).
