# Supplementary material for: In situ cell division and mortality rates of SAR11, SAR86, Bacteroidetes, and Aurantivirga during phytoplankton blooms reveal differences in population controls
Source: PubMed Central journal article supplement (PMC10308942; doi:10.1128/msystems.01287-22), 2023-05-17
Supplement: msystems.01287-22-s0007.pdf [file msystems.01287-22-s0007.pdf]

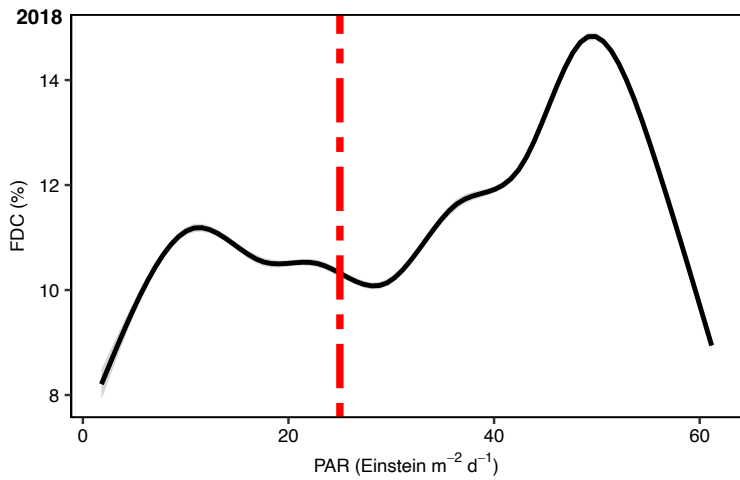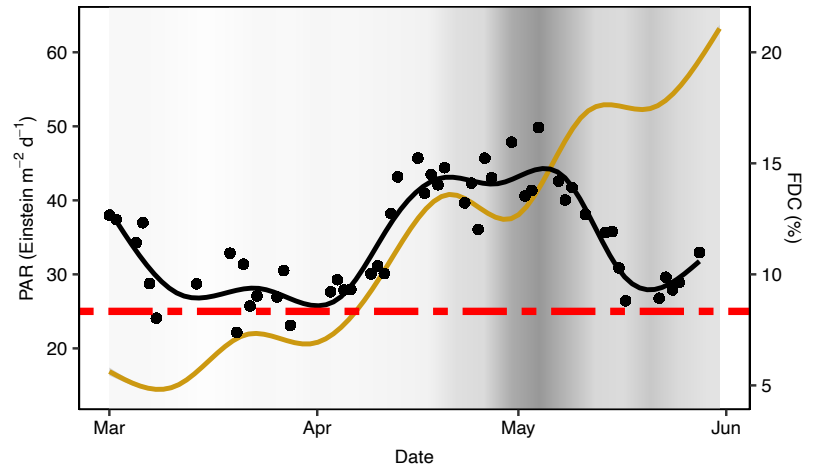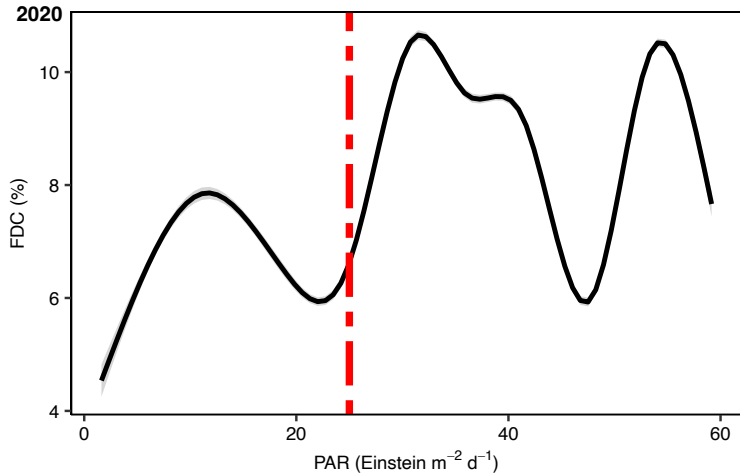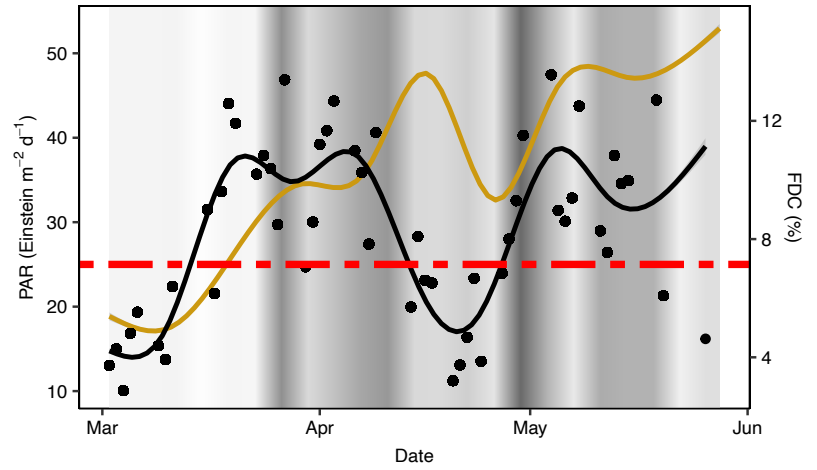

**Figure S7** Relationship of SAR11 FDC to PAR for 2018 and 2020. Left: FDC over Photosynthetically active radiation (PAR) on the left. A *loess* moving average is plotted. Right: PAR (ochre) and FDC (black) are plotted over the spring blooms with chlorophyll a plotted in the background. Scale is the same as Fig. 1 and 2. Red dashed line indicate potential threshold of 25 Einstein  $\text{m}^{-2} \text{d}^{-1}$  for SAR11 activity in the beginning of the bloom.
